# Supplementary material for: Pressure-induced boron clathrates with ambient-pressure superconductivity
Source: Royal Society of Chemistry journal article supplement (doi:10.1039/d1tc03419g), 2021-01-01
Supplement: d1tc03419g1.pdf [file d1tc03419g1.pdf]

**Supplemental Material**  
**for**  
**Pressure-induced Boron Clathrate with Ambient-pressure**  
**Superconductivity**

Yiwei Liang, Meiling Xu\*, Shuyi Lin, Xuanhao Yuan, Ziyang Qu, Jian Hao and Yinwei Li\*

Laboratory of Quantum Functional Materials Design and Application, School of Physics and Electronic Engineering,  
Jiangsu Normal University, Xuzhou 221116, China

To whom all correspondence should be addressed.

[xml@calypso.cn](mailto:xml@calypso.cn) and [yinwei\\_li@jsnu.edu.cn](mailto:yinwei_li@jsnu.edu.cn)

## Computational Details

The crystal structure searching is performed with CALYPSO code<sup>1-3</sup>. Unit cells containing 1-4 formula units were considered. In the first generation, a population of structures belonging to certain space group symmetries are randomly constructed. Starting from the second generation, 60% structures in the previous generation with the lower enthalpies are selected to produce the structures of next generation by the Particle Swarm Optimization (PSO) operators. The 40% structures in the new generation are randomly generated. A structure finger printing technique of bond characterization matrix is applied to the generated structures, so that identical structures are strictly forbidden. These procedures significantly enhance the diversity of the structures, which is crucial for structural global search efficiency. The structure search was considered converged when  $\sim 1000$  successive structures were generated after a lowest energy structure was found.

The phonon spectrum and electron-phonon coupling were calculated within linear-response theory with the QUANTUM ESPRESSO code<sup>4,5</sup>. Ultrasoft pseudopotentials for La and B were used. The kinetic cutoff energy of 70 Ry for  $R-3m$  LaB and  $P4/mmm$  LaB<sub>5</sub>, 80 Ry for  $P4/mbm$  LaB<sub>4</sub>,  $Cmmm$  LaB<sub>4</sub>,  $Pm-3m$  LaB<sub>6</sub> and  $R-3m$  LaB<sub>8</sub>, 90 Ry for  $Cmmm$  LaB<sub>6</sub>. The  $q$  mesh of  $5 \times 5 \times 5$  (19  $q$  points),  $4 \times 4 \times 4$  (18  $q$  points),  $3 \times 3 \times 3$  (8  $q$  points),  $5 \times 5 \times 5$  (18  $q$  points),  $6 \times 6 \times 6$  (20  $q$  points),  $4 \times 4 \times 4$  (21  $q$  points) and  $5 \times 5 \times 5$  (19  $q$  points) for the  $R-3m$  LaB,  $P4/mbm$  LaB<sub>4</sub>,  $Cmmm$  LaB<sub>4</sub>,  $P4/mmm$  LaB<sub>5</sub>,  $Pm-3m$  LaB<sub>6</sub>,  $Cmmm$  LaB<sub>6</sub> and  $R-3m$  LaB<sub>8</sub>, respectively, in the first Brillouin zone are used in the EPC calculations. Correspondingly, the  $k$  meshes was  $20 \times 20 \times 20$ ,  $16 \times 16 \times 16$ ,  $12 \times 12 \times 12$ ,  $20 \times 20 \times 20$ ,  $24 \times 24 \times 24$ ,  $16 \times 16 \times 16$  and  $20 \times 20 \times 20$  for  $R-3m$  LaB,  $P4/mbm$  LaB<sub>4</sub>,  $Cmmm$  LaB<sub>4</sub>,  $P4/mmm$  LaB<sub>5</sub>,  $Pm-3m$  LaB<sub>6</sub>,  $Cmmm$  LaB<sub>6</sub> and  $R-3m$  LaB<sub>8</sub>, respectively.

**Table SI.** The optimized structural parameters of LaB,  $Cmmm$  LaB<sub>4</sub>, LaB<sub>5</sub>,  $Cmmm$  LaB<sub>6</sub> and LaB<sub>8</sub> compounds.

| Phases                  | Pressure (GPa) | $a, b, c$ (Å, deg)           | Atomic position   |          |           |
|-------------------------|----------------|------------------------------|-------------------|----------|-----------|
| $R-3m$ LaB              | 0              | $a=b=c=8.398$                | La1 (2c) (0.91906 | 0.91906  | 0.91906)  |
|                         |                | $\alpha=\gamma=\beta=23.193$ | B1 (2c) (0.66667  | 0.66667  | 0.66667)  |
| $Cmmm$ LaB <sub>4</sub> | 90             | $a=b=8.06570$                | La1 (2) (-0.31475 | -0.68525 | -0.50000) |
|                         |                | $c=3.85730$                  | La3 (2) (-0.25340 | -0.25340 | -0.50000) |

|                                |    |                              |                   |          |           |
|--------------------------------|----|------------------------------|-------------------|----------|-----------|
|                                |    | $\alpha=\beta=90.0000$       | B1 (4) (-0.36493  | -0.94222 | 0.00000)  |
|                                |    | $\gamma=140.8757$            | B5 (4) (-0.35576  | -0.13386 | 0.00000)  |
|                                |    |                              | B9 (4) (-0.85727  | -0.14273 | -0.28772) |
|                                |    |                              | B13 (2) (-0.44090 | -0.55910 | -0.00000) |
|                                |    |                              | B15 (2) (-0.05288 | -0.94712 | 0.00000)  |
| <i>P4/mmm</i> LaB <sub>5</sub> | 80 | $a=b=3.976$                  | La1 (1b) (0.00000 | 0.00000  | 0.50000)  |
|                                |    | $c=2.829$                    | B1 (1d) (0.50000  | 0.50000  | 0.50000)  |
|                                |    | $\alpha=\gamma=\beta=90.000$ | B2 (4n) (0.20473  | 0.50000  | -0.00000) |
| <i>Cmmm</i> LaB <sub>6</sub>   | 75 | $a=b=5.288$                  | La1 (2) (0.79536  | -0.20464 | -0.00000) |
|                                |    | $c=3.827$                    | B1 (4) (0.69112   | -0.69112 | 0.79316)  |
|                                |    | $\alpha=\gamma=90.000$       | B2 (2) (0.88158   | -0.88158 | 0.50000)  |
|                                |    | $\beta=77.173$               | B5 (2) (0.59418   | -0.40582 | 0.50000)  |
|                                |    |                              | B6 (4) (0.56902   | -0.88300 | 0.50000)  |
| <i>R-3m</i> LaB <sub>8</sub>   | 0  | $a=b=c=4.330$                | La1 (1a) (0.00000 | 0.00000  | 0.00000)  |
|                                |    | $\alpha=\gamma=\beta=77.834$ | B1 (2c) (-0.70167 | -0.70167 | -0.70167) |
|                                |    |                              | B3 (6h) (-0.86527 | -0.41570 | -0.41570) |

**Table SII.** The optimized structural parameters of LaB, *Cmmm* LaB<sub>4</sub>, LaB<sub>5</sub>, *Cmmm* LaB<sub>6</sub> and LaB<sub>8</sub> compounds.

| Phases                         | $C_{11}$ | $C_{22}$ | $C_{33}$ | $C_{44}$ | $C_{55}$ | $C_{66}$ | $C_{12}$ | $C_{13}$ | $C_{23}$ | $B$ | $G$ | $H_{vc}$ | $H_{vt}$ |
|--------------------------------|----------|----------|----------|----------|----------|----------|----------|----------|----------|-----|-----|----------|----------|
| <i>R-3m</i> LaB                | 169      | 169      | 69       | 2        | 2        | 77       | 15       | 12       | 12       | 54  | 41  | 10       | 9        |
| <i>P4/mbm</i> LaB <sub>4</sub> | 396      | 396      | 409      | 144      | 144      | 148      | 60       | 51       | 51       | 170 | 156 | 32       | 30       |
| <i>Cmmm</i> LaB <sub>4</sub>   | 395      | 340      | 404      | 147      | 136      | 176      | 42       | 45       | 93       | 166 | 156 | 32       | 30       |
| <i>P4/mmm</i> LaB <sub>5</sub> | 565      | 565      | 329      | 56       | 56       | 233      | 58       | 49       | 49       | 197 | 156 | 26       | 25       |
| <i>Pm-3m</i> LaB <sub>6</sub>  | 476      | 476      | 476      | 100      | 100      | 100      | 23       | 23       | 23       | 174 | 150 | 29       | 27       |
| <i>Cmmm</i> LaB <sub>6</sub>   | 439      | 436      | 447      | 124      | 45       | 147      | 75       | 16       | 70       | 176 | 125 | 20       | 19       |
| <i>R-3m</i> LaB <sub>8</sub>   | 327      | 327      | 544      | 239      | 239      | 104      | 119      | 124      | 124      | 214 | 172 | 28       | 27       |

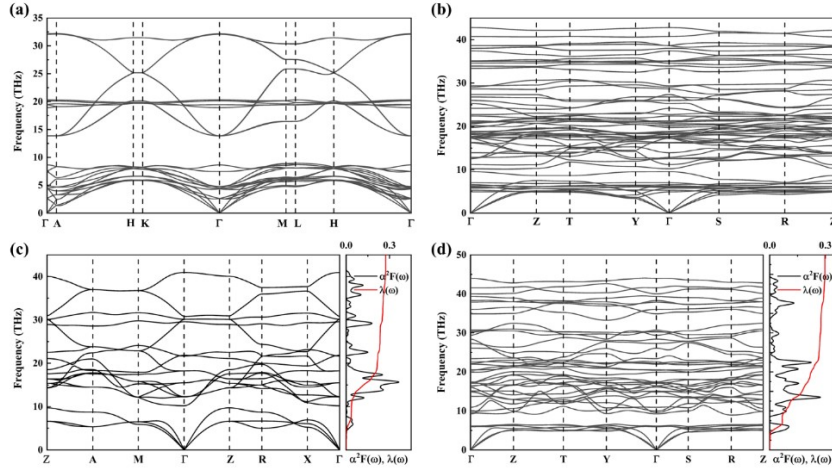

**Fig. S1.** The phonon dispersion relations of (a)  $R\text{-}3m$  LaB at 100 GPa, (b)  $Cmmm$  LaB<sub>4</sub> at 90 GPa. The phonon dispersion relations, Eliashberg function  $\alpha^2F(\omega)$  and integrated electron-phonon coupling (EPC) strength  $\lambda(\omega)$  of (c)  $P4/mmm$  LaB<sub>5</sub> at 80 GPa, (d)  $Cmmm$  LaB<sub>6</sub> at 75 GPa.

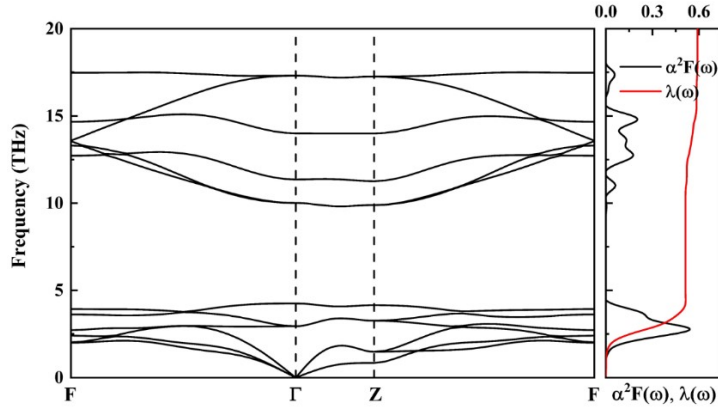

**Fig. S2.** The phonon dispersion relations, Eliashberg function  $\alpha^2F(\omega)$  and integrated electron-phonon coupling (EPC) strength  $\lambda(\omega)$  of LaB at 0 GPa.

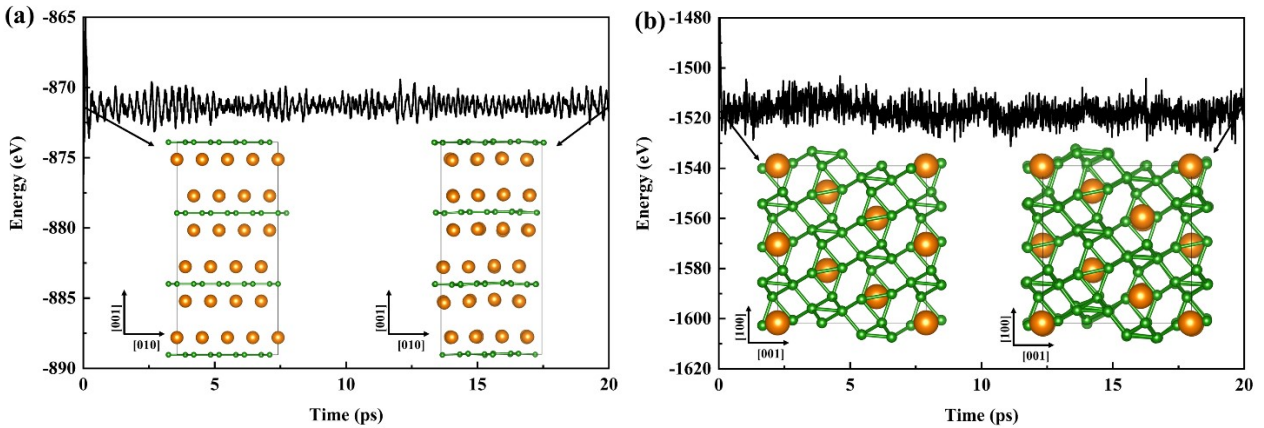

**Fig. S3.** Energy fluctuations during AIMD simulations up to 20 ps for (a)  $R\text{-}3m$  LaB and (b)  $R\text{-}3m$  LaB<sub>8</sub> at 0 GPa with 300 K.

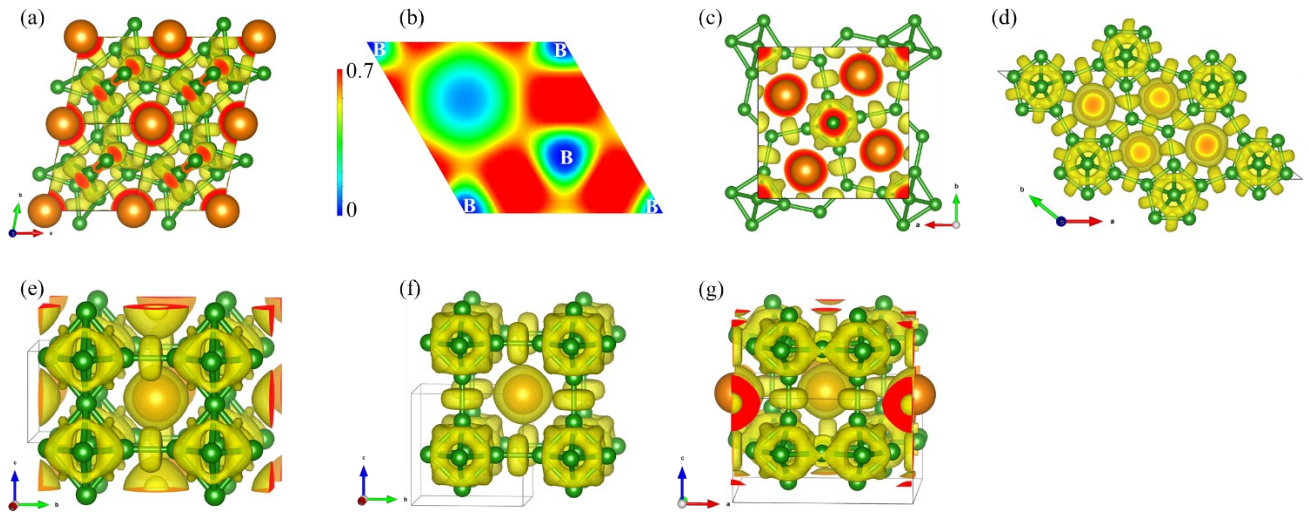

**Fig. S4.** Three-dimensional electron localization function (ELF) for (a)  $R-3m$   $\text{LaB}_8$  (c)  $P4/mbm$   $\text{LaB}_4$ , (d)  $Cmmm$   $\text{LaB}_4$ , (e)  $P4/mmm$   $\text{LaB}_5$ , (f)  $Pm-3m$   $\text{LaB}_6$ , (g)  $Cmmm$   $\text{LaB}_6$  and two-dimensional ELF of (b)  $R-3m$   $\text{LaB}$ .

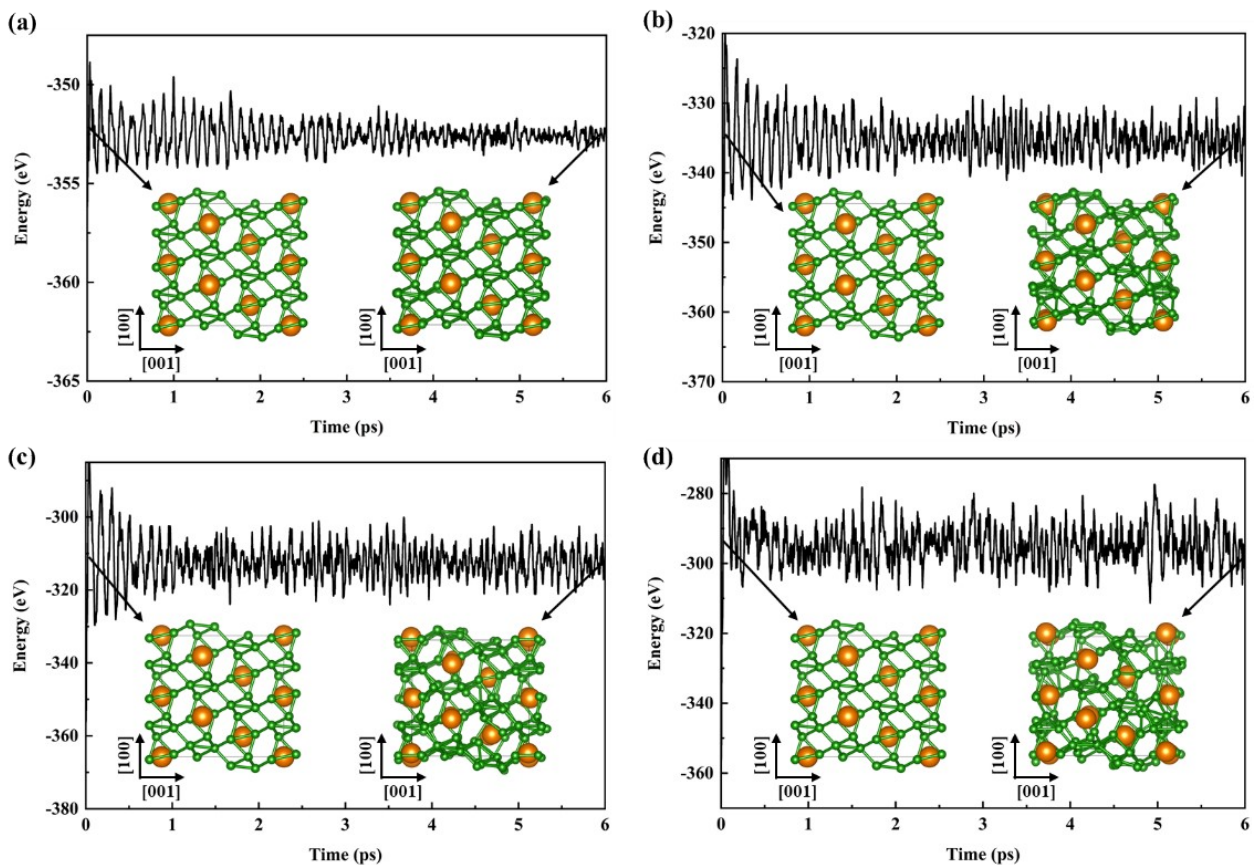

**Fig. S5** Evolution of relative energies during MD simulations of  $\text{LaB}_8$  at 70 GPa with (a) 300 K, (b) 1500 K, (c) 3000 K and (d) 4000 K. The insets are snapshots of structures at the first state and final state.

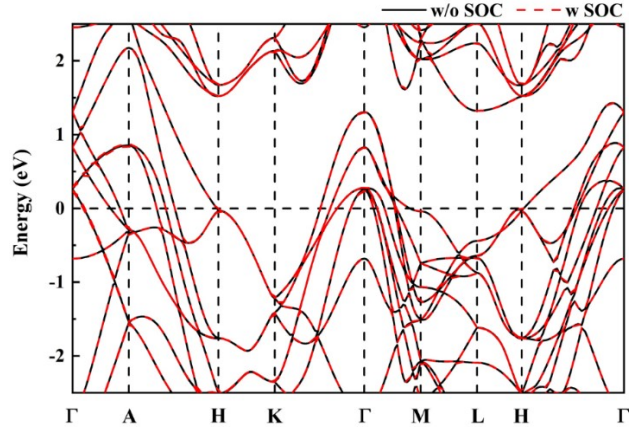

**Fig. S6** Band structures of  $\text{LaB}_8$  with and without spin-orbit effect.

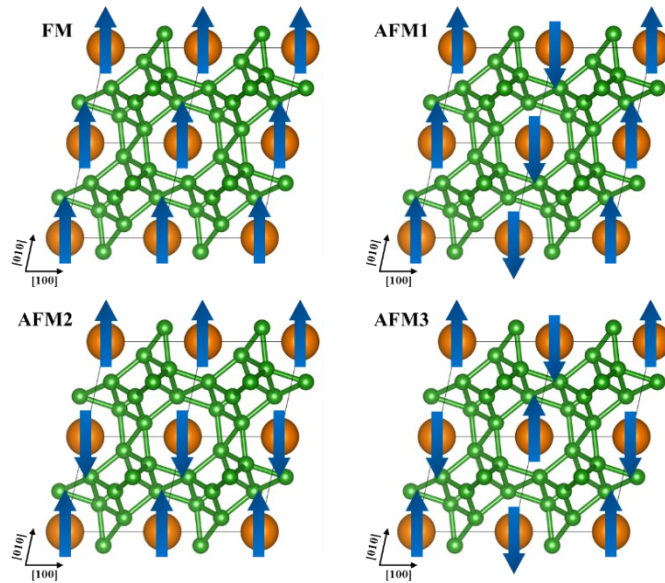

**Fig. S7** Four possible magnetic configurations of  $\text{LaB}_8$ . Large and small spheres represent La and B atoms, respectively. The blue arrows represent the spin directions of La atoms. Results suggest that  $\text{LaB}_8$  is nonmagnetic because the magnetic moment of each La atom is zero in considered magnetic phases.

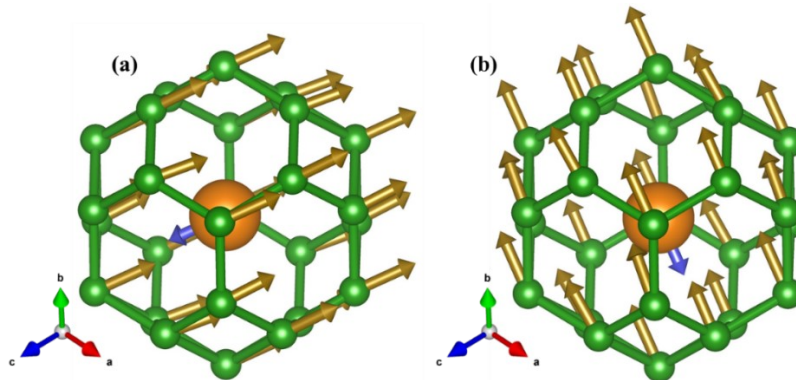

**Fig. S8.** Schematic illustrations of the atomic displacements of the Raman active  $E_u$  modes at the  $\Gamma$  point in  $R\text{-}3m$   $\text{LaB}_8$ .

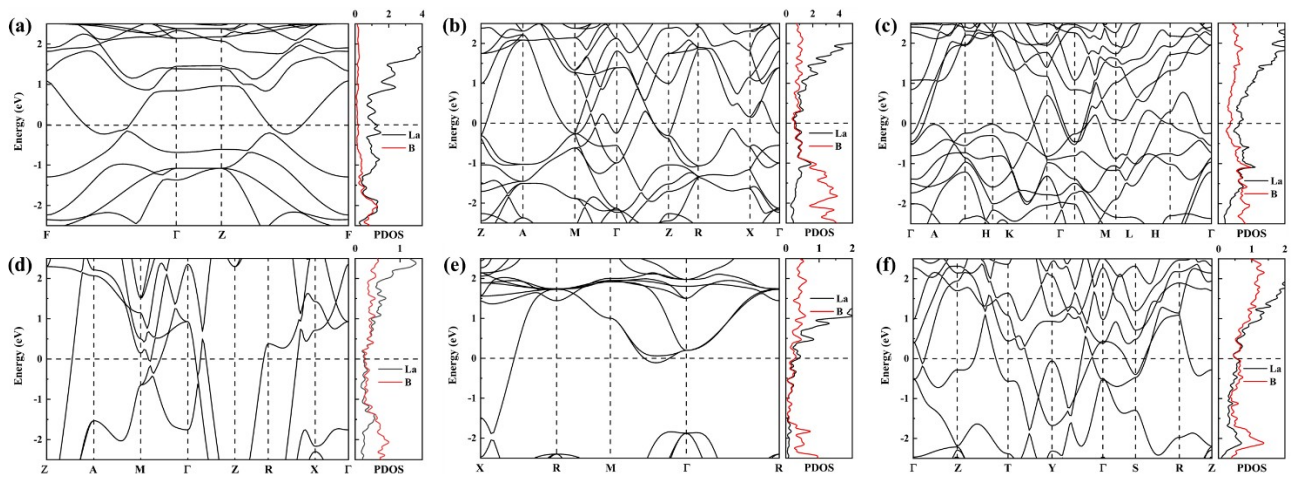

**Fig. S9.** Band structures and projected density of states (PDOS, in unit of states/eV/f.u.) of (a)  $R\bar{3}m$  LaB at 0 GPa, (b)  $P4/m\bar{b}m$  LaB<sub>4</sub> at 0 GPa, (c)  $Cmmm$  LaB<sub>4</sub> at 90 GPa, (d)  $P4/m\bar{m}m$  LaB<sub>5</sub> at 80 GPa, (e)  $Pm\bar{3}m$  LaB<sub>6</sub> at 0 GPa and (f)  $Cmmm$  LaB<sub>6</sub> at 75 GPa.

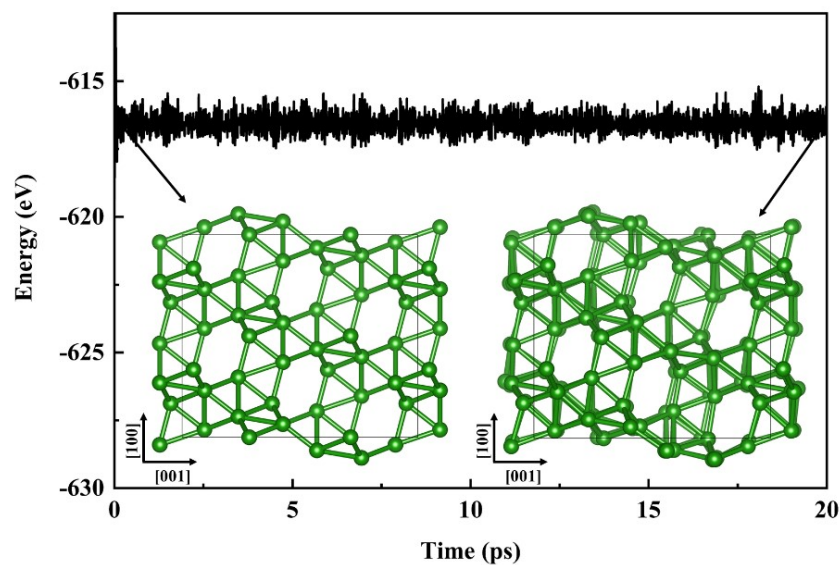

**Fig. S10.** Energy fluctuations during AIMD simulations up to 20 ps for the pure B<sub>26</sub> cage structure at 0 GPa with 300 K.

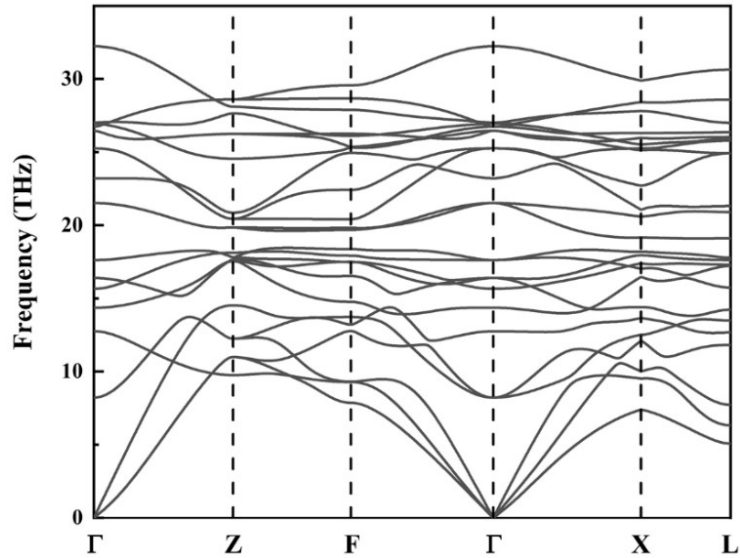

**Fig. S11.** Phonon dispersion relations for pure B<sub>26</sub> cage at 0 GPa, which is calculated by temperature dependent effective potential method<sup>6,7</sup> at 300 K.

### References

- 1 Y. Wang, J. Lv, L. Zhu and Y. Ma, *Comput. Phys. Commun.*, 2012, **183**, 2063–2070.
- 2 Y. Wang, J. Lv, L. Zhu and Y. Ma, *Phys. Rev. B*, 2010, **82**, 094116.
- 3 B. Gao, P. Gao, S. Lu, J. Lv, Y. Wang and Y. Ma, *Sci. Bull.*, 2019, **64**, 301–309.
- 4 S. Baroni, S. de Gironcoli, A. Dal Corso and P. Giannozzi, *Rev. Mod. Phys.*, 2001, **73**, 515–562.
- 5 P. Giannozzi, S. Baroni, N. Bonini, M. Calandra, R. Car, C. Cavazzoni, D. Ceresoli, G. L. Chiarotti, M. Cococcioni, I. Dabo, A. Dal Corso, S. de Gironcoli, S. Fabris, G. Fratesi, R. Gebauer, U. Gerstmann, C. Gougoussis, A. Kokalj, M. Lazzeri, L. Martin-Samos, N. Marzari, F. Mauri, R. Mazzarello, S. Paolini, A. Pasquarello, L. Paulatto, C. Sbraccia, S. Scandolo, G. Sclauzero, A. P. Seitsonen, A. Smogunov, P. Umari and R. M. Wentzcovitch, *J. Phys. Condens. Matter*, 2009, **21**, 395502.
- 6 O. Hellman, I. A. Abrikosov and S. I. Simak, *Phys. Rev. B*, 2011, **84**, 180301.
- 7 O. Hellman and I. A. Abrikosov, *Phys. Rev. B*, 2013, **88**, 144301.
